# Supplementary material for: Examining the elemental contribution towards the biodegradation of Mg–Zn–Ca ternary metallic glasses
Source: Royal Society of Chemistry journal article supplement (doi:10.1039/c6tb00342g), 2016-01-01
Supplement: c6tb00342g1.pdf [file c6tb00342g1.pdf]

## Supplementary Data

**Supplementary Table 1** Nominal alloy compositions as verified by EDS

| Composition                                       | Mg (at.%) | Zn (at.%) | Ca (at.%) |
|---------------------------------------------------|-----------|-----------|-----------|
| Mg <sub>66</sub> Zn <sub>30</sub> Ca <sub>4</sub> | 66.2      | 29.3      | 4.5       |
| Mg <sub>69</sub> Zn <sub>26</sub> Ca <sub>5</sub> | 68.9      | 25.5      | 5.6       |
| Mg <sub>69</sub> Zn <sub>27</sub> Ca <sub>4</sub> | 69.2      | 26.4      | 4.4       |
| Mg <sub>69</sub> Zn <sub>28</sub> Ca <sub>3</sub> | 69.3      | 27.4      | 3.3       |
| Mg <sub>72</sub> Zn <sub>24</sub> Ca <sub>4</sub> | 71.9      | 23.7      | 4.4       |

**Supplementary Table 2** Representative values extracted from EIS equivalent circuit fitting for  $Mg_{66}Zn_{30}Ca_4$ 

| <b>Time<br/>(h)</b> | <b><math>R_s</math><br/>(<math>\Omega \cdot cm^2</math>)</b> | <b><math>L_B</math><br/>(<math>H \cdot cm^2</math>)</b> | <b><math>C_B</math><br/>(<math>\mu F/cm^2</math>)</b> | <b><math>R_{CT}</math><br/>(<math>\Omega \cdot cm^2</math>)</b> | <b><math>Q_{DL}</math><br/>(<math>\mu F \cdot s^{(a-1)}/cm^2</math>)</b> | <b>A<br/>(<math>Q_{DL}</math>)</b> | <b><math>R_F</math><br/>(<math>\Omega \cdot cm^2</math>)</b> | <b>W<br/>(<math>\Omega \cdot cm^2 \cdot s^{-1/2}</math>)</b> |
|---------------------|--------------------------------------------------------------|---------------------------------------------------------|-------------------------------------------------------|-----------------------------------------------------------------|--------------------------------------------------------------------------|------------------------------------|--------------------------------------------------------------|--------------------------------------------------------------|
| Initial             | 16                                                           | 211544                                                  | -                                                     | 14340                                                           | 35                                                                       | 0.69                               | 392                                                          | 28405                                                        |
| 1                   | 15                                                           | 30165                                                   | -                                                     | 8973                                                            | 15                                                                       | 0.73                               | 1444                                                         | 60374                                                        |
| 4                   | 16                                                           | 25171                                                   | -                                                     | 6253                                                            | 2                                                                        | 0.88                               | 417                                                          | 20174                                                        |
| 8                   | 17                                                           | 25405                                                   | -                                                     | 6449                                                            | 1                                                                        | 0.85                               | 921                                                          | 24169                                                        |
| 24                  | 17                                                           | -                                                       | 0.12                                                  | 5324                                                            | 13                                                                       | 0.61                               | 5944                                                         | 6860                                                         |
| 32                  | 16                                                           | -                                                       | 0.15                                                  | 3803                                                            | 29                                                                       | 0.62                               | 6883                                                         | 2618                                                         |
| 48                  | 19                                                           | -                                                       | 0.19                                                  | 5234                                                            | 25                                                                       | 0.65                               | 3918                                                         | 1893                                                         |

**Supplementary Table 3** Representative values extracted from EIS equivalent circuit fitting for  $Mg_{72}Zn_{24}Ca_4$ 

| Time (h) | $R_s$ ( $\Omega \cdot cm^2$ ) | $C_b$ ( $\mu F/cm^2$ ) | $R_{ct}$ ( $\Omega \cdot cm^2$ ) | $Q_{dl}$ ( $\mu F \cdot s^{(a-1)}/cm^2$ ) | $a$ ( $Q_{dl}$ ) | $R_f$ ( $\Omega \cdot cm^2$ ) | $W$ ( $\Omega \cdot cm^2 \cdot s^{-1/2}$ ) |
|----------|-------------------------------|------------------------|----------------------------------|-------------------------------------------|------------------|-------------------------------|--------------------------------------------|
| Initial  | 19                            | 0.23                   | 4837                             | 15                                        | 0.62             | 125                           | 6671                                       |
| 1        | 20                            | 0.18                   | 1816                             | 10                                        | 0.62             | 263                           | 3767                                       |
| 4        | 20                            | 0.08                   | 894                              | 11                                        | 0.62             | 235                           | 2098                                       |
| 8        | 19                            | 0.08                   | 1353                             | 9                                         | 0.62             | 270                           | 2790                                       |
| 24       | 21                            | 0.14                   | 696                              | 65                                        | 0.50             | 213                           | 860                                        |
| 32       | 23                            | 0.10                   | 590                              | 73                                        | 0.54             | 153                           | 551                                        |
| 48       | 24                            | 0.00                   | 562                              | 200                                       | 0.50             | 172                           | 273                                        |

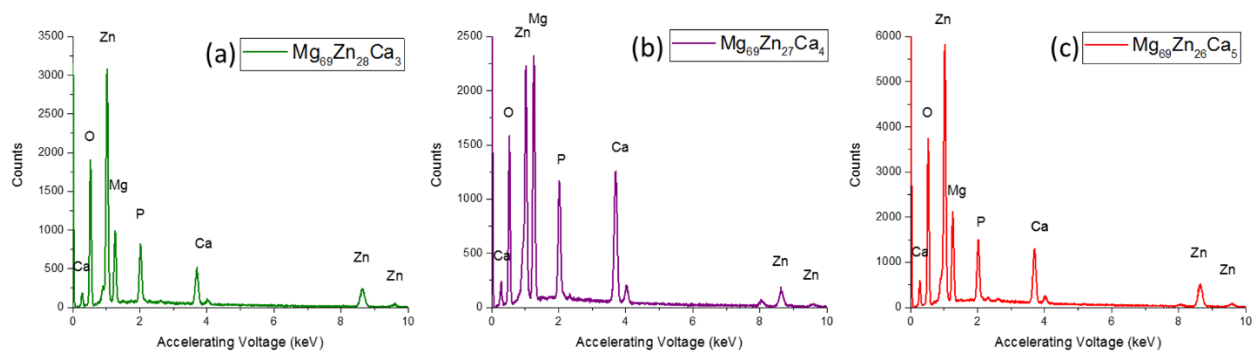

**Supplementary Figure 1** EDS spectra of (a)  $Mg_{69}Zn_{28}Ca_3$ , (b)  $Mg_{69}Zn_{27}Ca_4$  and (c)  $Mg_{69}Zn_{26}Ca_5$  for the images and EDS maps given in Figure 9
